# Supplementary material
Source: ML conference proceedings conference paper supplement (https://openaccess.thecvf.com/content/CVPR2023/html/Ahuja_Neural_Rate_Estimator_CVPR_2023_paper.html)
Supplement: Supplementary file 1 [file Ahuja_Neural_Rate_Estimator_CVPR_2023_supplemental.pdf]

# Supplementary Material for “Neural Rate Estimator and Unsupervised Learning for Efficient Distributed Image Analytics in Split-DNN models”

## Training details

| Hyper-parameter | Classification | Segmentation |
|-----------------|----------------|--------------|
| Optimizer       | SGD            | ADAM         |
| Learning Rate   | 0.5            | 1E-3         |
| Scheduler       | Step           | Step         |
| Scheduler Rate  | 15             | 10(S), 1(US) |
| Epochs          | 30 (S), 20(US) | 30(S), 1(US) |
| Batch Size      | 96             | 8            |

We present detailed results here on the outcomes of the hyperparameter search procedure outlined in Section 2.2 of the paper. As described, for each task we perform search the 4-dimensional hyperparameter space  $(C_r, S, L, Q)$  over the ranges provided in Table I using random search. We perform this search for each task (classification and segmentation) for both supervised and unsupervised scenarios at different split points. For each 4-tuple, we train the bottleneck layers and measure the resultant task metric (accuracy or mIOU) and rate (bpp, or bits-per-pixel). We then generate a scatter plot of the task metric against the bpp, from which we extract the Pareto frontier. The points on this frontier represent the optimal trade-off between task performance and compression level. The scatter plots, Pareto frontiers, along with the hyperparameter value for each point on the Pareto frontier are provided below.

## Architectural detail of hyper prior network

It is an autoencoder network consisting of two conv layers at the hyperprior encoder and two deconv layers in the decoder, viz. Conv1 ( $M \times 3 \times 3/1\downarrow$ ), Conv2 ( $8 \times 1 \times 1/1\downarrow$ ), and DeConv1 ( $M \times 1 \times 1/1\uparrow$ ), DeConv2 ( $M \times 3 \times 3/1\uparrow$ ) respectively, where  $M$  is the number of channels in the output of the bottleneck encoder.

The convention followed to denote a convolutional layer is  $M \times K_W \times K_H/S$ : where

$M$  = number of filters (equal to number of channels)

$K_H$  = kernel support height

$K_W$  = kernel support width and

$S$  = down- or upsampling stride, where  $\uparrow$  indicates upsampling and  $\downarrow$  downsampling.

## Complexity, Architecture and Task-performance of Various Bottleneck Topologies

| Bottleneck Topology           | Classification<br>Split Point: layer4[2] |       |         |                                                         | Segmentation<br>Split Point: Resnet50.layer4[2] |       |         |                                                        |
|-------------------------------|------------------------------------------|-------|---------|---------------------------------------------------------|-------------------------------------------------|-------|---------|--------------------------------------------------------|
|                               | Acc                                      | BPP   | # Param | Architecture detail of encoder                          | mIoU                                            | BPP   | # Param | Architecture detail of encoder                         |
| One conv layer                | 73.37                                    | 0.068 | 4.72M   | (128X3X3/2 $\downarrow$ )                               | 0.666                                           | 0.093 | 4.46M   | (64X3X3/4 $\downarrow$ )                               |
| Two conv layers               | 72.79                                    | 0.069 | 5.58M   | (2048X3X3/2 $\downarrow$ )<br>(128X1X1/1 $\downarrow$ ) | 0.660                                           | 0.086 | 45.36M  | (2048X3X3/4 $\downarrow$ )<br>(64X1X1/1 $\downarrow$ ) |
| One depthwise sep conv layer  | 74.91                                    | 0.069 | 0.57M   | (128X3X3/2 $\downarrow$ )                               | 0.671                                           | 0.089 | 0.31M   | (64X3X3/4 $\downarrow$ )                               |
| Two depthwise sep conv layers | 74.58                                    | 0.068 | 0.58M   | (2048X3X3/2 $\downarrow$ )<br>(128X1X1/1 $\downarrow$ ) | 0.638                                           | 0.102 | 0.32M   | (2048X3X3/4 $\downarrow$ )<br>(64X1X1/1 $\downarrow$ ) |

# Supervised

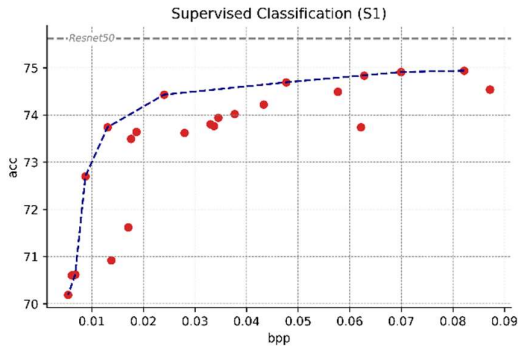

| Lambda   | Out channel | Quantization Factor | Stride | Accuracy | BPP    |
|----------|-------------|---------------------|--------|----------|--------|
| 1.27E-08 | 96          | 0.88687             | 2      | 74.938   | 0.0821 |
| 1.21E-08 | 128         | 3.38315             | 2      | 74.91    | 0.0699 |
| 1E-09    | 96          | 8                   | 2      | 74.692   | 0.0477 |
| 1.00E-08 | 96          | 1.5                 | 2      | 74.43    | 0.024  |
| 3.71E-08 | 96          | 6.35293             | 4      | 73.74    | 0.0130 |
| 8.86E-08 | 64          | 7.42024             | 4      | 72.698   | 0.0087 |
| 7.97E-07 | 32          | 5.58587             | 4      | 70.618   | 0.0067 |
| 6.85E-08 | 32          | 7.01792             | 4      | 70.188   | 0.0054 |

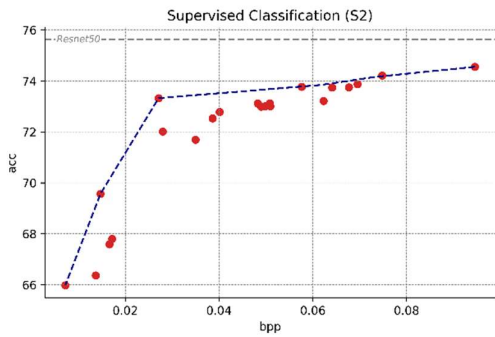

| Lambda   | Out channel | Quantization Factor | Stride | Accuracy | BPP     |
|----------|-------------|---------------------|--------|----------|---------|
| 1.00E-09 | 128         | 1.345               | 2      | 74.55    | 0.0946  |
| 3.44E-08 | 128         | 3.87209             | 2      | 74.15    | 0.0732  |
| 8.46E-07 | 96          | 1.88755             | 2      | 73.839   | 0.0618  |
| 4.30E-06 | 64          | 3.20017             | 2      | 73.32    | 0.0271  |
| 3.98E-08 | 96          | 3.9559              | 4      | 69.568   | 0.0147  |
| 2.18E-07 | 128         | 3.85557             | 4      | 65.98    | 0.00719 |

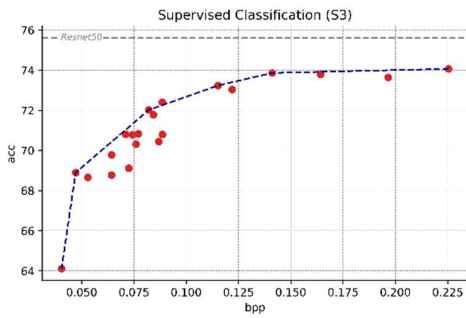

| Lambda   | Out channel | Quantization Factor | Stride | Accuracy | BPP    |
|----------|-------------|---------------------|--------|----------|--------|
| 9.72E-07 | 64          | 0.51635             | 2      | 74.058   | 0.2254 |
| 1E-08    | 64          | 3.66894             | 2      | 73.854   | 0.1410 |
| 1.13E-07 | 64          | 7.54644             | 2      | 73.228   | 0.1151 |
| 8.25E-08 | 64          | 6.94574             | 2      | 72.00999 | 0.0821 |
| 5.61E-08 | 96          | 7.26885             | 4      | 68.892   | 0.0471 |
| 7.54E-08 | 32          | 0.50803             | 4      | 64.112   | 0.0403 |

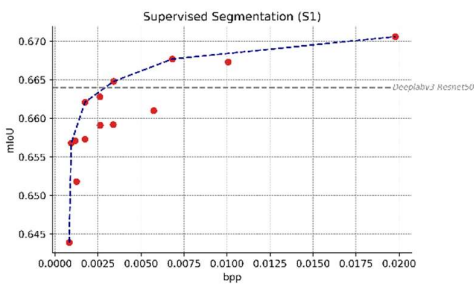

| Lambda   | Out channel | Quantization Factor | Stride | mIoU   | BPP    |
|----------|-------------|---------------------|--------|--------|--------|
| 3.62E-03 | 64          | 3.245               | 4      | 0.6691 | 0.0802 |
| 8.76E-03 | 32          | 0.512               | 4      | 0.6634 | 0.0514 |
| 9.52E-04 | 32          | 1                   | 4      | 0.6621 | 0.0385 |
| 6.79E-04 | 32          | 1.892               | 6      | 0.6452 | 0.0224 |
| 2.35E-03 | 32          | 4.782               | 4      | 0.6365 | 0.0165 |
| 1.67E-02 | 32          | 5.432               | 6      | 0.6039 | 0.0155 |

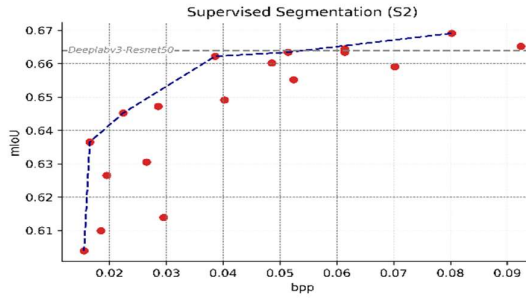

| Lambda | Out channel | Quantization Factor | Stride | mIoU   | BPP     |
|--------|-------------|---------------------|--------|--------|---------|
| 0.0025 | 16          | 1.278               | 6      | 0.6706 | 0.01978 |
| 0.0006 | 16          | 4.23                | 6      | 0.6677 | 0.00682 |
| 0.082  | 8           | 0.625               | 6      | 0.6648 | 0.00341 |
| 0.0001 | 4           | 3.158               | 6      | 0.6621 | 0.00175 |
| 0.0004 | 2           | 2.14                | 6      | 0.6568 | 0.00094 |
| 0.076  | 2           | 0.834               | 6      | 0.6439 | 0.00082 |

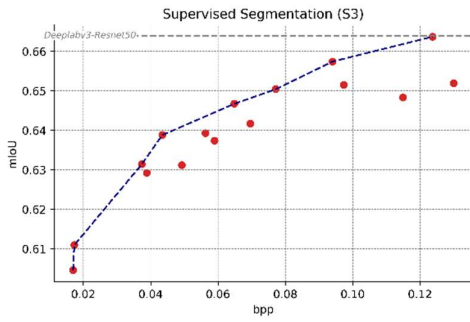

| Lambda  | Out channel | Quantization Factor | Stride | mIoU   | BPP    |
|---------|-------------|---------------------|--------|--------|--------|
| 0.00097 | 64          | 1.1749              | 2      | 0.6637 | 0.1237 |
| 0.0001  | 64          | 1.167               | 4      | 0.6574 | 0.094  |
| 0.00060 | 64          | 1.42407             | 4      | 0.6504 | 0.0771 |
| 0.00026 | 48          | 1.18992             | 4      | 0.6467 | 0.0648 |
| 0.0001  | 32          | 4                   | 4      | 0.6388 | 0.0434 |
| 0.00076 | 32          | 2.88061             | 4      | 0.6314 | 0.0373 |
| 0.00783 | 32          | 0.5                 | 6      | 0.6109 | 0.0173 |
| 0.00833 | 32          | 0.72141             | 6      | 0.6045 | 0.0169 |

## Unsupervised

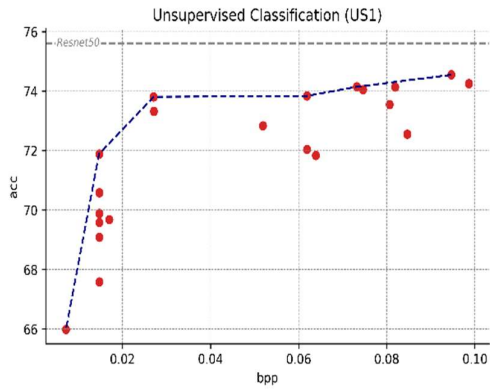

| Lambda   | Out channel | Quantization Factor | Stride | Accuracy | BPP    |
|----------|-------------|---------------------|--------|----------|--------|
| 1.00E-07 | 128         | 0.5                 | 2      | 74.55    | 0.0946 |
| 7.23E-10 | 128         | 1.5                 | 2      | 74.15    | 0.0732 |
| 3.20E-08 | 96          | 3.062               | 2      | 73.839   | 0.0618 |
| 1.72E-07 | 128         | 1                   | 4      | 73.81    | 0.0271 |
| 1.00E-07 | 64          | 2.78                | 4      | 71.89    | 0.0147 |
| 1.49E-06 | 64          | 3.3                 | 4      | 65.98    | 0.0071 |

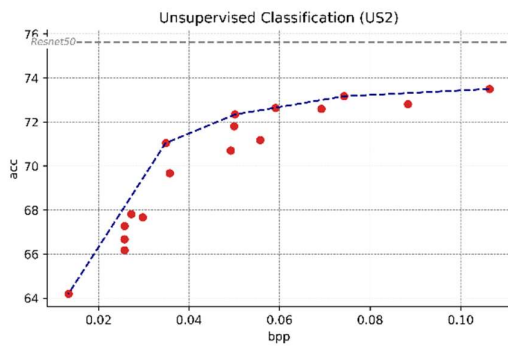

| Lambda   | Out channel | Quantization Factor | Stride | Accuracy | BPP    |
|----------|-------------|---------------------|--------|----------|--------|
| 1.00E-08 | 128         | 1                   | 2      | 73.498   | 0.1063 |
| 1.00E-07 | 128         | 2.623               | 2      | 73.17    | 0.0742 |
| 4.65E-08 | 96          | 4.37                | 2      | 72.34    | 0.0501 |
| 5.75E-09 | 64          | 5.33                | 2      | 71.04    | 0.0348 |
| 4.65E-10 | 96          | 2.73                | 4      | 64.18    | 0.0133 |

| Lambda | Out channel | Quantization Factor | Stride | mIoU | BPP |
|--------|-------------|---------------------|--------|------|-----|
|--------|-------------|---------------------|--------|------|-----|

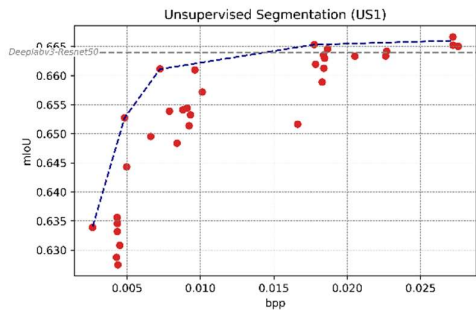

|          |    |       |   |        |         |
|----------|----|-------|---|--------|---------|
| 1.00E-08 | 32 | 1     | 6 | 0.666  | 0.0271  |
| 1.00E-08 | 16 | 2.56  | 6 | 0.6653 | 0.0177  |
| 1.00E-06 | 12 | 3.127 | 6 | 0.6611 | 0.00724 |
| 1.00E-06 | 8  | 0.893 | 6 | 0.6527 | 0.00483 |
| 1.00E-06 | 4  | 1.39  | 6 | 0.6339 | 0.00264 |

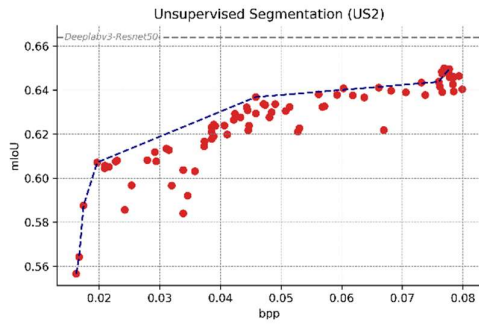

| Lambda    | Out channel | Quantization Factor | Stride | mIoU  | BPP     |
|-----------|-------------|---------------------|--------|-------|---------|
| 1.197E-12 | 48          | 1.904               | 4      | 0.649 | 0.07771 |
| 1.57E-13  | 48          | 1.995               | 4      | 0.643 | 0.0759  |
| 1.14E-12  | 48          | 1.904               | 4      | 0.636 | 0.0458  |
| 1E-16     | 32          | 3.48655             | 6      | 0.607 | 0.0196  |
| 0.000001  | 32          | 4.61145             | 6      | 0.587 | 0.0174  |
| 0.000001  | 32          | 5.27286             | 6      | 0.564 | 0.0166  |
| 1.54E-10  | 32          | 6                   | 6      | 0.556 | 0.0162  |
